# Supplementary material for: Ligand discrimination during virtual screening of the CB1 cannabinoid receptor crystal structures following cross-docking and microsecond molecular dynamics simulations
Source: Royal Society of Chemistry journal article supplement (doi:10.1039/c9ra01095e), 2019-01-01
Supplement: c9ra01095e3.pdf [file c9ra01095e3.pdf]

# Ligand Discrimination during Virtual Screening of CB1 Cannabinoid Receptor Crystal Structures following Cross-Docking and Microsecond Molecular Dynamics Simulations

*Jason S.E. Loo,<sup>1\*</sup> Abigail L. Emtage,<sup>2</sup> Lahari Murali,<sup>2</sup> Sze Siew Lee,<sup>1</sup> Alvina L.W. Kueh,<sup>1</sup> and  
Stephen P.H. Alexander<sup>3</sup>*

<sup>1</sup>School of Pharmacy, Faculty of Health and Medical Sciences, Taylor's University, No. 1 Jalan  
Taylors, 47500 Subang Jaya, Selangor, Malaysia

<sup>2</sup>School of Pharmacy, The University of Nottingham Malaysia Campus, Jalan Broga, 43500  
Semenyih, Selangor, Malaysia

<sup>3</sup>School of Life Sciences, University of Nottingham, Nottingham, NG7 2UH, United Kingdom

\* Corresponding Author

## SUPPLEMENTARY INFORMATION

**Table S1.** Active ligands used in virtual screening datasets. Ligands were obtained from the ChEMBL database.

| AGONISTS                 |         | ANTAGONISTS                |         |
|--------------------------|---------|----------------------------|---------|
| ChEMBL ID (name)         | Ki (nM) | ChEMBL ID (name)           | Ki (nM) |
| CHEMBL188 (WIN552122)    | 45      | CHEMBL376700 (NESS0327)    | 0.00035 |
| CHEMBL559612 (CP55940)   | 5.2     | CHEMBL111 (rimonabant)     | 0.2     |
| CHEMBL1950340            | 15      | CHEMBL220360 (taranabant)  | 0.3     |
| CHEMBL1223590            | 44.9    | CHEMBL496507               | 0.7     |
| CHEMBL442447             | 77      | CHEMBL484929 (PF0514273)   | 0.8     |
| CHEMBL244403             | 35      | CHEMBL496091               | 0.8     |
| CHEMBL232116             | 15      | CHEMBL497557               | 0.2     |
| CHEMBL1224631            | 15.6    | CHEMBL520345               | 0.7     |
| CHEMBL1224629            | 68      | CHEMBL562668 (otenabant)   | 0.1     |
| CHEMBL1223588            | 28.5    | CHEMBL2063237              | 0.03    |
| CHEMBL1223589            | 14.2    | CHEMBL2063240              | 0.07    |
| CHEMBL1223716            | 9       | CHEMBL496508               | 0.9     |
| CHEMBL1224689            | 51      | CHEMBL496293               | 0.9     |
| CHEMBL2029722            | 7.3     | CHEMBL2063246              | 0.1     |
| CHEMBL307696 (HU210)     | 0.2     | CHEMBL3341898 (AM6545)     | 1       |
| CHEMBL1224691            | 3.3     | CHEMBL201602               | 1       |
| CHEMBL1223592            | 19.3    | CHEMBL498783               | 1.2     |
| CHEMBL1223775            | 16.1    | CHEMBL522720               | 1.7     |
| CHEMBL1224630            | 6.4     | CHEMBL189676 (surinabant)  | 3.2     |
| CHEMBL1223591            | 32      | CHEMBL482985               | 9.8     |
| CHEMBL947 (Cesamet)      | 5.1     | CHEMBL496555               | 1.6     |
| CHEMBL1223778            | 4.7     | CHEMBL568221               | 3.8     |
| CHEMBL271158             | 12      | CHEMBL568230               | 5.2     |
| CHEMBL1828805            | 1.3     | CHEMBL2063238              | 7.5     |
| CHEMBL1828809            | 12.6    | CHEMBL412262 (ibipinabant) | 7.8     |
| CHEMBL2218896 (Nabilone) | 4.0     | CHEMBL495892               | 2.8     |
| CHEMBL1950335            | 56      | CHEMBL2063252              | 6.5     |
| CHEMBL1950348            | 36      | CHEMBL522395               | 9.8     |
| CHEMBL1950341            | 58      | CHEMBL482741               | 4.8     |
| CHEMBL1950344            | 34      | CHEMBL579196               | 5       |
| CHEMBL1950343            | 32      | CHEMBL2296781              | 6.0     |
| CHEMBL1828806            | 63.1    | CHEMBL2296777              | 6       |
| CHEMBL1950329            | 3       | CHEMBL285932 (AM251)       | 7.5     |
| CHEMBL1950357            | 51      | CHEMBL577040               | 9       |
| CHEMBL1950333            | 9       | CHEMBL518982               | 11      |
| CHEMBL1950353            | 31      | CHEMBL476833               | 13.2    |
| CHEMBL16901 (Honokiol)   | 6.5     | CHEMBL519863               | 13      |
| CHEMBL245876             | 3       | CHEMBL2296784              | 11.7    |
| CHEMBL2017678            | 6.3     | CHEMBL495891               | 15.0    |
| CHEMBL2177249            | 45      | CHEMBL2296782              | 19.8    |
| CHEMBL465 (Dronabinol)   | 41      | CHEMBL2296786              | 18.2    |
| CHEMBL2441251            | 77      | CHEMBL484163               | 25      |
| CHEMBL3323682            | 7.2     | CHEMBL4956506              | 32.3    |
| CHEMBL561013 (JWH018)    | 2.0     | CHEMBL2296783              | 31.1    |
| CHEMBL2029721            | 44.5    | CHEMBL2296779              | 47.0    |
| CHEMBL2029719            | 2.8     | CHEMBL36250                | 60.4    |
| CHEMBL1209573            | 12.6    | CHEMBL2296780              | 63      |
| CHEMBL1683648 (AM11542)  | 1.3     | CHEMBL286188               | 76.7    |
| CHEMBL2380416 (JWH073)   | 9.8     | CHEMBL285259               | 81.9    |
| CHEMBL3526578 (AM2201)   | 0.4     | CHEMBL349955               | 81.5    |

**Tables S2.** Best ligand RMSD relative to crystal structures following IFD with corresponding ROC AUC and adjusted logAUCs following virtual screening. The ligand used for the antagonist dataset was taranabant, while the ligand used for the agonist dataset was AM11542. RMSD values were calculated following optimal superimposition of the receptor transmembrane backbone.

**A) CB1-AM11542 simulations replicate 1**

| Time (ns) | Antagonist Dataset   |             |                | Agonist Dataset      |             |                |
|-----------|----------------------|-------------|----------------|----------------------|-------------|----------------|
|           | Best Ligand RMSD (Å) | ROC AUC (%) | Adj LogAUC (%) | Best Ligand RMSD (Å) | ROC AUC (%) | Adj LogAUC (%) |
| 0         | 5.74                 | 50.6        | -0.9           | 3.02                 | 80.5        | 17.7           |
| 50        | 7.75                 | 42.1        | -3.4           | 3.65                 | 80.5        | 15.1           |
| 100       | 3.23                 | 56.4        | 0.7            | 3.27                 | 72.5        | 9.3            |
| 150       | 5.18                 | 50.9        | -1.3           | 4.10                 | 71.6        | 13.6           |
| 200       | 5.79                 | 68.8        | 7.8            | 3.67                 | 74.5        | 10.7           |
| 250       | 6.60                 | 43.4        | -2.7           | 4.54                 | 64.7        | 4.1            |
| 300       | 5.96                 | 60.6        | 1.7            | 3.42                 | 72.9        | 10.9           |
| 350       | 6.36                 | 46.7        | -2.1           | 4.03                 | 78.5        | 21.6           |
| 400       | 2.78                 | 47.3        | -1.2           | 4.42                 | 68.2        | 11.3           |
| 450       | 3.92                 | 57.9        | 2.7            | 4.59                 | 70.1        | 10.1           |
| 500       | 5.41                 | 63.9        | 3.7            | 3.59                 | 69.4        | 6.9            |
| 550       | 4.31                 | 36.3        | -5.6           | 3.74                 | 71.8        | 16.9           |
| 600       | 6.63                 | 45.1        | -3.0           | 3.40                 | 55.6        | 1.1            |
| 650       | 6.67                 | 58.4        | 2.8            | 3.65                 | 75.4        | 16.5           |
| 700       | 6.75                 | 50.7        | 0.8            | 4.49                 | 75.0        | 13.3           |
| 750       | 5.67                 | 61.4        | 4.0            | 6.57                 | 81.7        | 19.3           |
| 800       | 6.74                 | 41.7        | -4.3           | 4.04                 | 82.7        | 28.3           |
| 850       | 6.52                 | 44.7        | -4.5           | 4.50                 | 72.9        | 9.6            |
| 900       | 6.41                 | 56.3        | 1.0            | 3.24                 | 70.9        | 10.5           |
| 950       | 8.10                 | 76.2        | 14.5           | 4.05                 | 73.7        | 9.4            |
| 1000      | 6.88                 | 46.7        | -2.0           | 4.89                 | 66.2        | 4.5            |

**B) CB1-AM11542 simulations replicate 2**

| Time (ns) | Antagonist Dataset   |             |                | Agonist Dataset      |             |                |
|-----------|----------------------|-------------|----------------|----------------------|-------------|----------------|
|           | Best Ligand RMSD (Å) | ROC AUC (%) | Adj LogAUC (%) | Best Ligand RMSD (Å) | ROC AUC (%) | Adj LogAUC (%) |
| 0         | 5.43                 | 64.3        | 3.1            | 2.95                 | 82.8        | 22.3           |
| 50        | 4.01                 | 44.5        | -2.5           | 4.15                 | 71.1        | 7.6            |
| 100       | 5.13                 | 46.1        | -4.0           | 3.37                 | 72.8        | 10.4           |
| 150       | 6.88                 | 74.0        | 9.7            | 2.96                 | 69.2        | 9.0            |
| 200       | 4.44                 | 28.0        | -8.5           | 4.92                 | 60.4        | 1.6            |
| 250       | 8.85                 | 61.5        | 2.5            | 7.20                 | 84.9        | 20.6           |
| 300       | 6.73                 | 62.7        | 2.3            | 3.10                 | 68.1        | 8.0            |
| 350       | 6.21                 | 64.3        | 3.1            | 4.62                 | 75.8        | 11.5           |
| 400       | 6.63                 | 54.1        | -0.1           | 7.24                 | 78.3        | 16.8           |
| 450       | 7.22                 | 38.2        | -6.2           | 3.75                 | 75.8        | 13.1           |
| 500       | 5.61                 | 49.1        | -0.8           | 6.95                 | 61.2        | 4.8            |
| 550       | 6.08                 | 69.3        | 4.8            | 4.63                 | 80.8        | 17.9           |
| 600       | 6.13                 | 70.6        | 9.8            | 6.97                 | 66.6        | 7.1            |
| 650       | 6.61                 | 53.0        | -1.5           | 5.17                 | 68.4        | 15.9           |
| 700       | 6.02                 | 60.8        | 2.1            | 5.11                 | 74.0        | 13.4           |
| 750       | 6.46                 | 44.4        | -4.1           | 6.93                 | 78.8        | 16.1           |
| 800       | 7.04                 | 65.4        | 5.7            | 3.11                 | 68.2        | 7.7            |
| 850       | 6.26                 | 47.8        | -2.8           | 4.53                 | 74.5        | 10.6           |
| 900       | 6.16                 | 73.9        | 12.5           | 3.46                 | 72.5        | 11.8           |
| 950       | 9.39                 | 47.1        | -2.6           | 4.66                 | 75.0        | 10.9           |
| 1000      | 9.55                 | 48.9        | -1.8           | 6.38                 | 64.5        | 6.7            |

**C) CB1-AM11542 simulations replicate 3**

| Time (ns) | Antagonist Dataset   |             |                | Agonist Dataset      |             |                |
|-----------|----------------------|-------------|----------------|----------------------|-------------|----------------|
|           | Best Ligand RMSD (Å) | ROC AUC (%) | Adj LogAUC (%) | Best Ligand RMSD (Å) | ROC AUC (%) | Adj LogAUC (%) |
| 0         | 5.66                 | 49.5        | -0.9           | 2.95                 | 84.1        | 23.3           |
| 50        | 6.52                 | 66.1        | 4.3            | 2.73                 | 68.9        | 5.5            |
| 100       | 5.46                 | 57.1        | 0.5            | 3.66                 | 71.0        | 8.4            |
| 150       | 6.61                 | 79.3        | 14.6           | 3.00                 | 76.2        | 11.7           |
| 200       | 4.58                 | 44.4        | -3.5           | 3.46                 | 69.4        | 7.8            |
| 250       | 5.48                 | 53.4        | -1.1           | 3.41                 | 75.3        | 13.2           |
| 300       | 5.63                 | 67.0        | 6.8            | 3.59                 | 75.3        | 13.3           |
| 350       | 6.92                 | 40.7        | -5.0           | 3.69                 | 70.7        | 13.5           |
| 400       | 4.67                 | 58.4        | 0.6            | 3.30                 | 83.1        | 16.2           |
| 450       | 6.97                 | 44.0        | -2.2           | 3.43                 | 73.1        | 7.9            |
| 500       | 8.74                 | 54.7        | 3.0            | 3.35                 | 80.2        | 14.7           |
| 550       | 5.76                 | 48.7        | -0.7           | 3.66                 | 76.2        | 14.6           |
| 600       | 7.43                 | 51.0        | 0.9            | 3.19                 | 74.4        | 14.4           |
| 650       | 7.21                 | 61.5        | 4.4            | 3.18                 | 72.6        | 11.8           |
| 700       | 6.12                 | 47.9        | 1.8            | 4.47                 | 61.0        | 4.0            |
| 750       | 6.90                 | 72.7        | 10.7           | 3.06                 | 81.3        | 22.8           |
| 800       | 6.85                 | 51.4        | -0.7           | 3.16                 | 68.3        | 12.4           |
| 850       | 6.52                 | 36.8        | -5.8           | 3.09                 | 76.3        | 17.9           |
| 900       | 5.28                 | 42.4        | -2.3           | 2.43                 | 72.9        | 16.0           |
| 950       | 6.82                 | 49.4        | 0.5            | 3.71                 | 77.7        | 14.4           |
| 1000      | 6.64                 | 57.9        | 1.7            | 3.58                 | 68.7        | 7.1            |

**D) CBI\*-taranabant simulations replicate 1**

| Time (ns) | Antagonist Dataset   |             |                | Agonist Dataset      |             |                |
|-----------|----------------------|-------------|----------------|----------------------|-------------|----------------|
|           | Best Ligand RMSD (Å) | ROC AUC (%) | Adj LogAUC (%) | Best Ligand RMSD (Å) | ROC AUC (%) | Adj LogAUC (%) |
| 0         | 6.84                 | 39.2        | -5.3           | 0.89                 | 77.5        | 22             |
| 50        | 6.21                 | 55.3        | 3.6            | 0.66                 | 76.8        | 21.3           |
| 100       | 6.61                 | 48.2        | -2.7           | 2.61                 | 74.8        | 13.4           |
| 150       | 5.84                 | 50.7        | -2.0           | 1.59                 | 73.6        | 12.6           |
| 200       | 6.27                 | 50.2        | -0.3           | 0.98                 | 76.8        | 13.8           |
| 250       | 6.61                 | 47.8        | -1.9           | 1.26                 | 75.9        | 13.4           |
| 300       | 6.98                 | 33.3        | -7.2           | 1.19                 | 80.4        | 15.2           |
| 350       | 6.63                 | 33.4        | -7.2           | 0.92                 | 74.7        | 10.7           |
| 400       | 6.17                 | 44.2        | -2.2           | 0.91                 | 72.6        | 10.6           |
| 450       | 6.60                 | 65.9        | 6.1            | 0.66                 | 66.1        | 5.9            |
| 500       | 5.98                 | 37.0        | -6.1           | 0.92                 | 82.6        | 17.4           |
| 550       | 6.24                 | 51.0        | -0.1           | 1.52                 | 71.0        | 6.7            |
| 600       | 6.53                 | 55.1        | -0.1           | 1.14                 | 77.7        | 13.2           |
| 650       | 6.35                 | 31.3        | -7.7           | 1.07                 | 72.4        | 8.5            |
| 700       | 5.83                 | 27.2        | -8.3           | 2.23                 | 75.0        | 10.7           |
| 750       | 6.33                 | 44.5        | -4.5           | 1.24                 | 71.0        | 8.8            |
| 800       | 5.94                 | 48.3        | -2.0           | 1.53                 | 75.0        | 11.3           |
| 850       | 6.12                 | 57.4        | 0.7            | 0.66                 | 71.4        | 8.6            |
| 900       | 6.31                 | 50.3        | -0.8           | 2.44                 | 49.8        | -0.9           |
| 950       | 6.02                 | 53.4        | -1.2           | 2.00                 | 66.9        | 8.1            |
| 1000      | 6.05                 | 37.0        | -5.0           | 0.96                 | 79.1        | 14.7           |

**E) CB1\*-taranabant simulations replicate 2**

| Time (ns) | Antagonist Dataset   |             |                | Agonist Dataset      |             |                |
|-----------|----------------------|-------------|----------------|----------------------|-------------|----------------|
|           | Best Ligand RMSD (Å) | ROC AUC (%) | Adj LogAUC (%) | Best Ligand RMSD (Å) | ROC AUC (%) | Adj LogAUC (%) |
| 0         | 6.84                 | 36.7        | -5.9           | 0.84                 | 77.2        | 16.2           |
| 50        | 7.67                 | 52.5        | 2.7            | 0.58                 | 76.7        | 13.9           |
| 100       | 6.77                 | 54.4        | 0.5            | 0.86                 | 78.1        | 12.1           |
| 150       | 6.62                 | 56.0        | 2.2            | 1.03                 | 72.3        | 12.6           |
| 200       | 6.38                 | 54.7        | -0.8           | 0.63                 | 80.3        | 18.5           |
| 250       | 6.73                 | 69.1        | 8.5            | 0.54                 | 82.9        | 19.9           |
| 300       | 6.77                 | 58.4        | 2.1            | 0.95                 | 70.6        | 11.1           |
| 350       | 5.72                 | 66.6        | 7.9            | 0.83                 | 73.8        | 9.4            |
| 400       | 6.09                 | 45.0        | -3.4           | 0.63                 | 78.3        | 16.7           |
| 450       | 6.03                 | 52.8        | 0.4            | 0.87                 | 78.7        | 15.9           |
| 500       | 6.66                 | 60.9        | 3.5            | 2.50                 | 71.8        | 7.6            |
| 550       | 6.23                 | 48.9        | -0.8           | 0.78                 | 68.6        | 8.5            |
| 600       | 6.98                 | 55.0        | 0.2            | 1.07                 | 74.7        | 14.9           |
| 650       | 6.91                 | 60.7        | 3.6            | 1.88                 | 81.4        | 16.8           |
| 700       | 6.98                 | 61.6        | 4.0            | 0.81                 | 70.4        | 8.8            |
| 750       | 6.43                 | 49.0        | -2.0           | 0.70                 | 75.9        | 15.0           |
| 800       | 6.90                 | 61.8        | 1.2            | 1.20                 | 78.1        | 15.8           |
| 850       | 6.99                 | 47.7        | -3.0           | 1.10                 | 75.0        | 12.1           |
| 900       | 6.37                 | 50.4        | -0.5           | 2.86                 | 76.6        | 16.1           |
| 950       | 6.76                 | 50.2        | -1.3           | 3.59                 | 67.7        | 5.2            |
| 1000      | 6.88                 | 56.5        | -0.6           | 0.93                 | 77.5        | 11.9           |

**F) CB1\*-taranabant simulations replicate 3**

| Time (ns) | Antagonist Dataset   |             |                | Agonist Dataset      |             |                |
|-----------|----------------------|-------------|----------------|----------------------|-------------|----------------|
|           | Best Ligand RMSD (Å) | ROC AUC (%) | Adj LogAUC (%) | Best Ligand RMSD (Å) | ROC AUC (%) | Adj LogAUC (%) |
| 0         | 6.84                 | 39.1        | -5.3           | 0.89                 | 80.4        | 21.1           |
| 50        | 6.70                 | 58.3        | 3.3            | 0.66                 | 85.0        | 24.2           |
| 100       | 6.19                 | 49.8        | -1.8           | 0.99                 | 77.8        | 16.6           |
| 150       | 6.81                 | 36.4        | -6.5           | 2.68                 | 74.8        | 10.4           |
| 200       | 6.08                 | 57.5        | 1.8            | 4.38                 | 77.4        | 14.5           |
| 250       | 6.62                 | 55.5        | 0.8            | 0.45                 | 80.0        | 18.3           |
| 300       | 6.95                 | 50.3        | -0.9           | 0.46                 | 81.1        | 16.3           |
| 350       | 6.37                 | 66.5        | 7.9            | 7.36                 | 77.0        | 21.3           |
| 400       | 6.25                 | 49.2        | 0.4            | 1.44                 | 70.6        | 8.9            |
| 450       | 5.99                 | 54.5        | 0.0            | 1.50                 | 75.0        | 12.8           |
| 500       | 6.38                 | 51.7        | -0.3           | 1.34                 | 75.6        | 13.5           |
| 550       | 6.99                 | 47.4        | -2.7           | 0.61                 | 77.3        | 15.4           |
| 600       | 6.66                 | 52.4        | 0.8            | 0.86                 | 71.5        | 9.8            |
| 650       | 6.12                 | 47.1        | -2.6           | 0.86                 | 74.6        | 14.5           |
| 700       | 5.94                 | 43.5        | -4.2           | 1.04                 | 69.6        | 5.7            |
| 750       | 6.43                 | 50.2        | -0.7           | 2.86                 | 73.7        | 10.2           |
| 800       | 6.90                 | 61.8        | 1.2            | 1.37                 | 68.9        | 5.9            |
| 850       | 6.48                 | 46.6        | -2.1           | 1.57                 | 72.3        | 7.5            |
| 900       | 6.52                 | 45.5        | -3.5           | 1.29                 | 73.0        | 8.7            |
| 950       | 6.47                 | 46.5        | -1.8           | 1.89                 | 76.1        | 16.5           |
| 1000      | 6.00                 | 41.7        | -4.2           | 3.44                 | 80.3        | 28.6           |



**G) CB1-AM11542 simulations mean values**

| Time (ns)        | Antagonist Dataset             |                       |                          | Agonist Dataset                |                       |                          |
|------------------|--------------------------------|-----------------------|--------------------------|--------------------------------|-----------------------|--------------------------|
|                  | Mean Best Ligand RMSD (Å ± SD) | Mean ROC AUC (% ± SD) | Mean Adj LogAUC (% ± SD) | Mean Best Ligand RMSD (Å ± SD) | Mean ROC AUC (% ± SD) | Mean Adj LogAUC (% ± SD) |
| 0                | 5.61 ± 0.13                    | 54.8 ± 6.7            | 0.5 ± 1.9                | 2.98 ± 0.03                    | 82.5 ± 1.5            | 21.1 ± 2.4               |
| 50               | 6.09 ± 1.56                    | 50.9 ± 10.8           | -0.5 ± 3.4               | 3.51 ± 0.59                    | 73.5 ± 5.0            | 9.4 ± 4.1                |
| 100              | 4.61 ± 0.98                    | 53.2 ± 5.0            | -0.9 ± 2.2               | 3.43 ± 0.16                    | 72.1 ± 0.8            | 9.4 ± 0.8                |
| 150              | 6.22 ± 0.75                    | 68.1 ± 12.3           | 7.7 ± 6.7                | 3.35 ± 0.53                    | 72.3 ± 2.9            | 11.4 ± 1.9               |
| 200              | 4.94 ± 0.60                    | 47.1 ± 16.8           | -1.4 ± 6.8               | 4.02 ± 0.65                    | 68.1 ± 5.8            | 6.7 ± 3.7                |
| 250              | 6.98 ± 1.40                    | 52.8 ± 7.4            | -0.4 ± 2.2               | 5.05 ± 1.59                    | 75.0 ± 8.2            | 12.6 ± 6.7               |
| 300              | 6.11 ± 0.46                    | 63.4 ± 2.7            | 3.6 ± 2.3                | 3.37 ± 0.20                    | 72.1 ± 3.0            | 10.7 ± 2.2               |
| 350              | 6.50 ± 0.31                    | 50.6 ± 10.0           | -1.3 ± 3.4               | 4.11 ± 0.39                    | 75.0 ± 3.2            | 15.6 ± 4.4               |
| 400              | 4.69 ± 1.57                    | 53.3 ± 4.6            | -0.2 ± 0.7               | 4.99 ± 1.66                    | 76.5 ± 6.2            | 14.8 ± 2.5               |
| 450              | 6.03 ± 1.50                    | 46.7 ± 8.3            | -1.9 ± 3.6               | 3.92 ± 0.49                    | 73.0 ± 2.3            | 10.3 ± 2.1               |
| 500              | 6.58 ± 1.52                    | 55.9 ± 6.1            | 2.0 ± 2.0                | 4.63 ± 1.64                    | 70.3 ± 7.8            | 8.8 ± 4.3                |
| 550              | 5.38 ± 0.77                    | 51.4 ± 13.6           | -0.5 ± 4.2               | 4.01 ± 0.44                    | 76.3 ± 3.7            | 16.5 ± 1.4               |
| 600              | 6.73 ± 0.53                    | 55.6 ± 10.9           | 2.6 ± 5.3                | 4.52 ± 1.73                    | 65.5 ± 7.7            | 7.5 ± 5.5                |
| 650              | 6.83 ± 0.27                    | 57.6 ± 3.5            | 1.9 ± 2.5                | 4.00 ± 0.85                    | 72.1 ± 2.9            | 14.7 ± 2.1               |
| 700              | 6.30 ± 0.32                    | 53.1 ± 5.5            | 1.5 ± 0.6                | 4.69 ± 0.30                    | 70.0 ± 6.4            | 10.2 ± 4.4               |
| 750              | 6.35 ± 0.51                    | 59.5 ± 11.6           | 3.5 ± 6.0                | 5.52 ± 1.75                    | 80.6 ± 1.3            | 19.4 ± 2.7               |
| 800              | 6.88 ± 0.12                    | 52.8 ± 9.7            | 0.2 ± 4.1                | 3.44 ± 0.43                    | 73.1 ± 6.8            | 16.1 ± 8.8               |
| 850              | 6.43 ± 0.12                    | 43.1 ± 4.6            | -4.4 ± 1.2               | 4.04 ± 0.67                    | 74.6 ± 1.4            | 12.7 ± 3.7               |
| 900              | 5.95 ± 0.48                    | 57.5 ± 12.9           | 3.7 ± 6.4                | 3.05 ± 0.44                    | 72.1 ± 0.9            | 12.8 ± 2.3               |
| 950              | 8.10 ± 1.05                    | 57.6 ± 13.2           | 4.1 ± 7.4                | 4.14 ± 0.39                    | 75.5 ± 1.7            | 11.5 ± 2.1               |
| 1000             | 7.69 ± 1.32                    | 51.2 ± 4.8            | -0.7 ± 1.7               | 4.95 ± 1.14                    | 66.5 ± 1.7            | 6.1 ± 1.2                |
| Whole simulation | 6.23 ± 1.26                    | 54.1 ± 10.9           | 0.9 ± 4.9                | 4.08 ± 1.17                    | 73.2 ± 6.1            | 12.3 ± 5.4               |

## H) CB1\*-taranabant simulations mean values

| Time (ns)        | Antagonist Dataset             |                       |                          | Agonist Dataset                |                       |                          |
|------------------|--------------------------------|-----------------------|--------------------------|--------------------------------|-----------------------|--------------------------|
|                  | Mean Best Ligand RMSD (Å ± SD) | Mean ROC AUC (% ± SD) | Mean Adj LogAUC (% ± SD) | Mean Best Ligand RMSD (Å ± SD) | Mean ROC AUC (% ± SD) | Mean Adj LogAUC (% ± SD) |
| 0                | 6.84 ± 0.00                    | 38.3 ± 1.2            | -5.5 ± 0.3               | 0.87 ± 0.02                    | 78.4 ± 1.4            | 19.8 ± 2.5               |
| 50               | 6.86 ± 0.61                    | 55.4 ± 2.4            | 3.2 ± 0.4                | 0.64 ± 0.04                    | 79.5 ± 3.9            | 19.8 ± 4.3               |
| 100              | 6.52 ± 0.24                    | 50.8 ± 2.6            | -1.3 ± 1.3               | 1.49 ± 0.80                    | 76.9 ± 1.5            | 14.0 ± 1.9               |
| 150              | 6.42 ± 0.42                    | 47.7 ± 8.3            | -2.1 ± 3.6               | 1.76 ± 0.68                    | 73.6 ± 1.0            | 11.9 ± 1.0               |
| 200              | 6.24 ± 0.12                    | 54.1 ± 3.0            | 0.2 ± 1.1                | 2.00 ± 1.69                    | 78.2 ± 1.5            | 15.6 ± 2.1               |
| 250              | 6.65 ± 0.05                    | 57.5 ± 8.8            | 2.5 ± 4.4                | 0.75 ± 0.36                    | 79.6 ± 2.9            | 17.2 ± 2.8               |
| 300              | 6.90 ± 0.10                    | 47.3 ± 10.5           | -2.0 ± 3.9               | 0.87 ± 0.31                    | 77.4 ± 4.8            | 14.2 ± 2.2               |
| 350              | 6.24 ± 0.38                    | 55.5 ± 15.6           | 2.9 ± 7.1                | 3.04 ± 3.06                    | 75.2 ± 1.3            | 13.8 ± 5.3               |
| 400              | 6.17 ± 0.07                    | 46.1 ± 2.2            | -1.7 ± 1.6               | 1.00 ± 0.34                    | 73.8 ± 3.3            | 12.1 ± 3.3               |
| 450              | 6.21 ± 0.28                    | 57.7 ± 5.8            | 2.2 ± 2.8                | 1.01 ± 0.36                    | 73.3 ± 5.3            | 11.5 ± 4.2               |
| 500              | 6.34 ± 0.28                    | 49.9 ± 9.8            | -1.0 ± 3.9               | 1.58 ± 0.67                    | 76.7 ± 4.5            | 12.8 ± 4.0               |
| 550              | 6.49 ± 0.36                    | 49.1 ± 1.5            | -1.2 ± 1.1               | 0.97 ± 0.40                    | 72.3 ± 3.7            | 10.2 ± 3.7               |
| 600              | 6.72 ± 0.19                    | 54.2 ± 1.2            | 0.3 ± 0.4                | 1.02 ± 0.12                    | 74.6 ± 2.5            | 12.6 ± 2.1               |
| 650              | 6.46 ± 0.33                    | 46.4 ± 12.0           | -2.2 ± 4.6               | 1.27 ± 0.44                    | 76.1 ± 3.8            | 13.3 ± 3.5               |
| 700              | 6.25 ± 0.52                    | 44.1 ± 14.1           | -2.8 ± 5.1               | 1.36 ± 0.62                    | 71.7 ± 2.4            | 8.4 ± 2.1                |
| 750              | 6.40 ± 0.05                    | 47.9 ± 2.5            | -2.4 ± 1.6               | 1.60 ± 0.92                    | 73.5 ± 2.0            | 11.3 ± 2.7               |
| 800              | 6.58 ± 0.45                    | 57.3 ± 6.4            | 0.1 ± 1.5                | 1.36 ± 0.13                    | 74.0 ± 3.8            | 11.0 ± 4.0               |
| 850              | 6.53 ± 0.35                    | 50.6 ± 4.9            | -1.5 ± 1.6               | 1.11 ± 0.37                    | 72.9 ± 1.5            | 9.4 ± 2.0                |
| 900              | 6.40 ± 0.09                    | 48.7 ± 2.3            | -1.6 ± 1.3               | 2.19 ± 0.66                    | 66.5 ± 11.9           | 8.0 ± 7.0                |
| 950              | 6.42 ± 0.31                    | 50.0 ± 2.8            | -1.4 ± 0.3               | 2.49 ± 0.78                    | 70.2 ± 4.2            | 9.9 ± 4.8                |
| 1000             | 6.31 ± 0.40                    | 45.1 ± 8.3            | -3.3 ± 1.9               | 1.78 ± 1.17                    | 79.0 ± 1.1            | 18.4 ± 7.3               |
| Whole simulation | 6.47 ± 0.38                    | 50.2 ± 8.9            | -0.9 ± 3.7               | 1.44 ± 1.11                    | 74.9 ± 5.1            | 13.1 ± 5.1               |

**Tables S3.** ROC AUC and adjusted logAUCs following virtual screening *without* prior IFD.

**A) CB1-AM11542 simulations replicate 1**

| Time (ns) | Antagonist Dataset |                | Agonist Dataset |                |
|-----------|--------------------|----------------|-----------------|----------------|
|           | ROC AUC (%)        | Adj LogAUC (%) | ROC AUC (%)     | Adj LogAUC (%) |
| 0         | 34.6               | -7.1           | 76.4            | 13.5           |
| 50        | 48.4               | -2.2           | 75.5            | 12.7           |
| 100       | 39.8               | -5.6           | 79.6            | 13.7           |
| 150       | 45.6               | -3.8           | 69.3            | 7.3            |
| 200       | 45.2               | -3.2           | 75.2            | 12.2           |
| 250       | 35.4               | -7.3           | 72.1            | 8.0            |
| 300       | 50.8               | -1.8           | 70.9            | 9.5            |
| 350       | 44.6               | -4.5           | 78.0            | 16.6           |
| 400       | 41.4               | -4.9           | 72.5            | 8.1            |
| 450       | 47.5               | -2.2           | 81.3            | 16.6           |
| 500       | 54.8               | 1.1            | 71.3            | 8.0            |
| 550       | 56.8               | 1.7            | 76.2            | 12.0           |
| 600       | 63.8               | 5.0            | 82.5            | 21.6           |
| 650       | 40.4               | -4.8           | 75.4            | 12.3           |
| 700       | 37.9               | -6.1           | 69.9            | 8.0            |
| 750       | 40.7               | -5.2           | 69.6            | 6.6            |
| 800       | 47.3               | -3.4           | 76.5            | 13.9           |
| 850       | 40.5               | -3.0           | 78.5            | 17.6           |
| 900       | 29.1               | -7.7           | 77.9            | 17.8           |
| 950       | 35.7               | -6.8           | 72.1            | 11.6           |
| 1000      | 40.3               | -4.7           | 77.0            | 20.4           |

**B) CB1-AM11542 simulations replicate 2**

| Time (ns) | Antagonist Dataset |                | Agonist Dataset |                |
|-----------|--------------------|----------------|-----------------|----------------|
|           | ROC AUC (%)        | Adj LogAUC (%) | ROC AUC (%)     | Adj LogAUC (%) |
| 0         | 38.2               | -6.6           | 74.5            | 15.2           |
| 50        | 35.3               | -6.8           | 82.0            | 18.8           |
| 100       | 42.6               | -4.0           | 80.6            | 22.4           |
| 150       | 60.0               | 1.6            | 72.5            | 9.8            |
| 200       | 58.1               | 1.0            | 78.2            | 13.8           |
| 250       | 49.8               | -1.9           | 78.5            | 15.7           |
| 300       | 44.7               | -4.3           | 78.3            | 13.9           |
| 350       | 57.7               | 1.4            | 77.4            | 13.9           |
| 400       | 56.0               | 0.1            | 81.9            | 18.1           |
| 450       | 59.2               | 1.4            | 77.5            | 13.3           |
| 500       | 52.1               | -0.4           | 64.2            | 5.0            |
| 550       | 65.6               | 7.4            | 77.1            | 14.0           |
| 600       | 42.4               | -4.3           | 72.7            | 10.4           |
| 650       | 49.3               | -2.6           | 79.1            | 18.0           |
| 700       | 61.7               | 2.6            | 78.4            | 13.8           |
| 750       | 46.0               | -2.6           | 74.2            | 11.8           |
| 800       | 62.4               | 2.8            | 74.4            | 17.5           |
| 850       | 60.7               | 4.7            | 76              | 11.6           |
| 900       | 52.8               | -0.6           | 87.8            | 24.9           |
| 950       | 49.9               | -1.8           | 74.5            | 11.6           |
| 1000      | 65.9               | 5.3            | 78.1            | 12.6           |

**C) CB1-AM11542 simulations replicate 3**

| Time (ns) | Antagonist Dataset |                | Agonist Dataset |                |
|-----------|--------------------|----------------|-----------------|----------------|
|           | ROC AUC (%)        | Adj LogAUC (%) | ROC AUC (%)     | Adj LogAUC (%) |
| 0         | 46.6               | -3.7           | 74.6            | 14.5           |
| 50        | 37.1               | -5.4           | 75.8            | 11.9           |
| 100       | 57.2               | 0.0            | 68.1            | 7.8            |
| 150       | 55.9               | -0.9           | 72.9            | 9.7            |
| 200       | 36.6               | -6.6           | 68.9            | 6.9            |
| 250       | 55.6               | 0.1            | 68.0            | 10.6           |
| 300       | 46.4               | -3.2           | 78.3            | 16.9           |
| 350       | 60.2               | 3.1            | 78.2            | 13.5           |
| 400       | 39.5               | -5.3           | 72.8            | 8.2            |
| 450       | 71.0               | 11.1           | 76.6            | 12.2           |
| 500       | 48.7               | -2.0           | 74.8            | 9.5            |
| 550       | 45.6               | -3.6           | 71.6            | 10.4           |
| 600       | 58.8               | 3.2            | 83.5            | 26.0           |
| 650       | 49.2               | -2.0           | 75.1            | 14.2           |
| 700       | 47.4               | -3.5           | 72.4            | 11.0           |
| 750       | 37.6               | -6.4           | 79.2            | 14.8           |
| 800       | 57.1               | 1.4            | 76.0            | 21.7           |
| 850       | 66.8               | 10.3           | 70.2            | 13.5           |
| 900       | 54.1               | 3.4            | 77.1            | 16.0           |
| 950       | 40.5               | -3.9           | 79.7            | 19.7           |
| 1000      | 43.0               | -3.6           | 76.5            | 11.7           |

**D) CBI\*-taranabant simulations replicate 1**

| Time (ns) | Antagonist Dataset |                | Agonist Dataset |                |
|-----------|--------------------|----------------|-----------------|----------------|
|           | ROC AUC (%)        | Adj LogAUC (%) | ROC AUC (%)     | Adj LogAUC (%) |
| 0         | 47.1               | -2.5           | 78.7            | 14.6           |
| 50        | 59.3               | 0.8            | 72.3            | 11.4           |
| 100       | 54.4               | 0.2            | 73.5            | 11.9           |
| 150       | 50.6               | -0.2           | 66.3            | 4.8            |
| 200       | 53.1               | 0.8            | 75.5            | 11.3           |
| 250       | 61.9               | 3.8            | 68.6            | 8.3            |
| 300       | 49.1               | -2.9           | 67.3            | 6.3            |
| 350       | 39.0               | -5.9           | 68.8            | 7.5            |
| 400       | 53.8               | -0.2           | 72.1            | 8.5            |
| 450       | 58.3               | 2.9            | 73.8            | 11.0           |
| 500       | 50.7               | -0.9           | 71.2            | 9.1            |
| 550       | 52.1               | -0.5           | 77.2            | 13.8           |
| 600       | 54.5               | 0.2            | 68.9            | 10.6           |
| 650       | 47.2               | -2.8           | 77.8            | 13.6           |
| 700       | 53.0               | 1.1            | 68.3            | 8.1            |
| 750       | 55.0               | 1.6            | 69.4            | 9.7            |
| 800       | 53.3               | -1.3           | 67.6            | 9.2            |
| 850       | 55.9               | 0.0            | 74.7            | 12.4           |
| 900       | 59.0               | 1.3            | 65.6            | 5.6            |
| 950       | 56.9               | 2.1            | 73.5            | 10.3           |
| 1000      | 65.8               | 6.5            | 66.4            | 8.4            |

**E) CB1\*-taranabant simulations replicate 2**

| Time (ns) | Antagonist Dataset |                | Agonist Dataset |                |
|-----------|--------------------|----------------|-----------------|----------------|
|           | ROC AUC (%)        | Adj LogAUC (%) | ROC AUC (%)     | Adj LogAUC (%) |
| 0         | 54.9               | 0.3            | 79.6            | 15.1           |
| 50        | 63.8               | 3.1            | 78.9            | 17.2           |
| 100       | 56.0               | -0.7           | 76.0            | 13.6           |
| 150       | 64.5               | 3.0            | 77.3            | 11.7           |
| 200       | 57.3               | 0.5            | 75.1            | 12.0           |
| 250       | 58.4               | 1.1            | 80.0            | 16.1           |
| 300       | 60.2               | 4.8            | 84.7            | 20.0           |
| 350       | 52.7               | -0.5           | 71.5            | 11.6           |
| 400       | 52.6               | -1.2           | 76.5            | 11.3           |
| 450       | 57.4               | 0.5            | 74.4            | 11.4           |
| 500       | 55.4               | -0.9           | 68.1            | 8.3            |
| 550       | 60.5               | 4.9            | 71.0            | 9.0            |
| 600       | 60.8               | 2.9            | 67.2            | 6.8            |
| 650       | 59.0               | 1.3            | 67.9            | 7.1            |
| 700       | 60.2               | 2.2            | 69.0            | 7.0            |
| 750       | 58.2               | 1.0            | 72.9            | 10.5           |
| 800       | 60.8               | 3.5            | 75.5            | 10.8           |
| 850       | 59.5               | 1.2            | 75.8            | 12.0           |
| 900       | 51.0               | -2.0           | 74.7            | 10.8           |
| 950       | 48.2               | -2.9           | 76.1            | 13.1           |
| 1000      | 53.6               | 0.4            | 73.0            | 11.3           |

**F) CB1\*-taranabant simulations replicate 3**

| Time (ns) | Antagonist Dataset |                | Agonist Dataset |                |
|-----------|--------------------|----------------|-----------------|----------------|
|           | ROC AUC (%)        | Adj LogAUC (%) | ROC AUC (%)     | Adj LogAUC (%) |
| 0         | 42.1               | -2.3           | 80.6            | 16.4           |
| 50        | 50.3               | -1.3           | 77.5            | 13.2           |
| 100       | 51.9               | -2.1           | 68.7            | 8.2            |
| 150       | 42.5               | -4.4           | 73.7            | 10.6           |
| 200       | 57.4               | 0.4            | 77.1            | 14.1           |
| 250       | 56.9               | 1.2            | 76.9            | 10.1           |
| 300       | 49.0               | -2.5           | 72.0            | 12.6           |
| 350       | 54.2               | -0.5           | 71.5            | 9.9            |
| 400       | 51.1               | -1.3           | 70.1            | 8.7            |
| 450       | 43.1               | -4.3           | 73.2            | 9.1            |
| 500       | 52.0               | -2.3           | 72.5            | 10.0           |
| 550       | 49.4               | -2.8           | 77.6            | 12.1           |
| 600       | 42.9               | -3.8           | 72.0            | 10.2           |
| 650       | 60.5               | 2.1            | 68.7            | 5.4            |
| 700       | 50.7               | -1.0           | 78.5            | 14.7           |
| 750       | 57.0               | 2.0            | 67.6            | 10.0           |
| 800       | 65.4               | 4.0            | 65.5            | 4.8            |
| 850       | 58.9               | 2.2            | 74.2            | 9.9            |
| 900       | 57.4               | 1.8            | 70.2            | 7.1            |
| 950       | 56.2               | 1.3            | 67.8            | 8.0            |
| 1000      | 71.9               | 6.8            | 66.9            | 5.6            |



**G) CB1-AM11542 simulations mean values**

| Time (ns)        | Antagonist Dataset    |                          | Agonist Dataset       |                          |
|------------------|-----------------------|--------------------------|-----------------------|--------------------------|
|                  | Mean ROC AUC (% ± SD) | Mean Adj LogAUC (% ± SD) | Mean ROC AUC (% ± SD) | Mean Adj LogAUC (% ± SD) |
| 0                | 39.8 ± 5.0            | -5.8 ± 1.5               | 75.2 ± 0.9            | 14.4 ± 0.7               |
| 50               | 40.3 ± 5.8            | -4.8 ± 1.9               | 77.8 ± 3.0            | 14.5 ± 3.0               |
| 100              | 46.5 ± 7.6            | -3.2 ± 2.4               | 76.1 ± 5.7            | 14.7 ± 6.0               |
| 150              | 53.8 ± 6.1            | -1.0 ± 2.2               | 71.6 ± 1.6            | 8.9 ± 1.2                |
| 200              | 46.6 ± 8.8            | -2.9 ± 3.1               | 74.1 ± 3.9            | 10.9 ± 3.0               |
| 250              | 46.9 ± 8.5            | -3.0 ± 3.1               | 72.9 ± 4.3            | 11.4 ± 3.2               |
| 300              | 47.3 ± 2.6            | -3.1 ± 1.0               | 75.8 ± 3.5            | 13.4 ± 3.0               |
| 350              | 54.2 ± 6.8            | 0.0 ± 3.3                | 77.9 ± 0.3            | 14.7 ± 1.4               |
| 400              | 45.6 ± 7.4            | -3.4 ± 2.4               | 75.7 ± 4.4            | 11.5 ± 4.7               |
| 450              | 59.2 ± 9.6            | 3.5 ± 5.6                | 78.5 ± 2.0            | 14.0 ± 1.9               |
| 500              | 51.9 ± 2.5            | -0.4 ± 1.2               | 70.1 ± 4.4            | 7.5 ± 1.9                |
| 550              | 56.0 ± 8.2            | 1.8 ± 4.5                | 75.0 ± 2.4            | 12.1 ± 1.5               |
| 600              | 55.0 ± 9.1            | 1.3 ± 4.0                | 79.6 ± 4.9            | 19.3 ± 6.5               |
| 650              | 46.3 ± 4.2            | -3.1 ± 1.2               | 76.5 ± 1.8            | 14.8 ± 2.4               |
| 700              | 49.0 ± 9.8            | -2.3 ± 3.7               | 73.6 ± 3.6            | 10.9 ± 2.4               |
| 750              | 41.4 ± 3.5            | -4.7 ± 1.6               | 74.3 ± 3.9            | 11.1 ± 3.4               |
| 800              | 55.6 ± 6.3            | 0.3 ± 2.6                | 75.6 ± 0.9            | 17.7 ± 3.2               |
| 850              | 56.0 ± 11.2           | 4.0 ± 5.4                | 74.9 ± 3.5            | 14.3 ± 2.5               |
| 900              | 45.3 ± 11.5           | -1.6 ± 4.6               | 80.9 ± 4.9            | 19.6 ± 3.9               |
| 950              | 42.0 ± 5.9            | -4.2 ± 2.1               | 75.4 ± 3.2            | 14.3 ± 3.8               |
| 1000             | 49.7 ± 11.5           | -1.0 ± 4.5               | 77.2 ± 0.7            | 14.9 ± 3.9               |
| Whole simulation | 49.0 ± 9.5            | -1.6 ± 4.2               | 75.6 ± 4.2            | 13.6 ± 4.5               |

**H) CB1\*-taranabant simulations mean values**

| Time (ns)        | Antagonist Dataset    |                          | Agonist Dataset       |                          |
|------------------|-----------------------|--------------------------|-----------------------|--------------------------|
|                  | Mean ROC AUC (% ± SD) | Mean Adj LogAUC (% ± SD) | Mean ROC AUC (% ± SD) | Mean Adj LogAUC (% ± SD) |
| 0                | 48.0 ± 5.3            | -1.5 ± 1.3               | 79.6 ± 0.8            | 15.3 ± 0.8               |
| 50               | 57.8 ± 5.6            | 0.9 ± 1.8                | 76.2 ± 2.8            | 14.0 ± 2.4               |
| 100              | 54.1 ± 1.7            | -0.9 ± 1.0               | 72.7 ± 3.0            | 11.2 ± 2.3               |
| 150              | 52.5 ± 9.1            | -0.6 ± 3.0               | 72.4 ± 4.6            | 9.0 ± 3.0                |
| 200              | 55.9 ± 2.0            | 0.6 ± 0.2                | 75.9 ± 0.9            | 12.5 ± 1.2               |
| 250              | 59.1 ± 2.1            | 2.0 ± 1.3                | 75.2 ± 4.8            | 11.5 ± 3.3               |
| 300              | 52.8 ± 5.3            | -0.2 ± 3.5               | 74.7 ± 7.3            | 13.0 ± 5.6               |
| 350              | 48.6 ± 6.8            | -2.3 ± 2.5               | 70.6 ± 1.3            | 9.7 ± 1.7                |
| 400              | 52.5 ± 1.1            | -0.9 ± 0.5               | 72.9 ± 2.7            | 9.5 ± 1.3                |
| 450              | 52.9 ± 7.0            | -0.3 ± 3.0               | 73.8 ± 0.5            | 10.5 ± 1.0               |
| 500              | 52.7 ± 2.0            | -1.4 ± 0.6               | 70.6 ± 1.8            | 9.2 ± 0.7                |
| 550              | 54.0 ± 4.7            | 0.6 ± 3.2                | 75.3 ± 3.0            | 11.6 ± 2.0               |
| 600              | 52.7 ± 7.4            | -0.3 ± 2.8               | 69.4 ± 2.0            | 9.2 ± 1.7                |
| 650              | 55.6 ± 5.9            | 0.2 ± 2.1                | 71.5 ± 4.5            | 8.7 ± 3.5                |
| 700              | 54.6 ± 4.0            | 0.8 ± 1.3                | 71.9 ± 4.7            | 9.9 ± 3.4                |
| 750              | 56.7 ± 1.3            | 1.5 ± 0.4                | 70.0 ± 2.2            | 10.0 ± 0.3               |
| 800              | 59.8 ± 5.0            | 2.1 ± 2.4                | 69.5 ± 4.3            | 8.3 ± 2.6                |
| 850              | 58.1 ± 1.6            | 1.2 ± 0.9                | 74.9 ± 0.7            | 11.4 ± 1.1               |
| 900              | 55.8 ± 3.5            | 0.4 ± 1.7                | 70.2 ± 3.7            | 7.8 ± 2.2                |
| 950              | 53.8 ± 3.9            | 0.2 ± 2.2                | 72.5 ± 3.5            | 10.5 ± 2.1               |
| 1000             | 63.8 ± 7.6            | 4.6 ± 2.9                | 68.8 ± 3.0            | 8.4 ± 2.3                |
| Whole simulation | 54.9 ± 6.1            | 0.3 ± 2.5                | 72.8 ± 4.4            | 10.5 ± 3.1               |

**Tables S4.** ROC AUC and adjusted log AUC values for virtual screenings using only active ligands (for the antagonist dataset the agonist ligands were considered as the only inactives and vice versa). Decoy molecules were excluded from calculations.

**A) Crystal structures**

| Crystal structure     | Antagonist Dataset |                | Agonist Dataset |                |
|-----------------------|--------------------|----------------|-----------------|----------------|
|                       | ROC AUC (%)        | Adj LogAUC (%) | ROC AUC (%)     | Adj LogAUC (%) |
| Inactive state (5U09) | 67.5               | 13.9           | 32.5            | -7.5           |
| Active state (5XRA)   | 23.7               | -7.7           | 76.3            | 11.4           |

**B) CB1-AM11542 simulations replicate 1**

| Time (ns) | Antagonist Dataset   |             |                | Agonist Dataset      |             |                |
|-----------|----------------------|-------------|----------------|----------------------|-------------|----------------|
|           | Best Ligand RMSD (Å) | ROC AUC (%) | Adj LogAUC (%) | Best Ligand RMSD (Å) | ROC AUC (%) | Adj LogAUC (%) |
| 0         | 5.74                 | 8.7         | -12.6          | 3.02                 | 91.2        | 28             |
| 50        | 7.75                 | 30.4        | 6.0            | 3.65                 | 69.6        | 7.4            |
| 100       | 3.23                 | 47.4        | -2.3           | 3.27                 | 52.6        | 2.5            |
| 150       | 5.18                 | 53.2        | 0.0            | 4.10                 | 46.8        | -0.1           |
| 200       | 5.79                 | 50.8        | 0.2            | 3.67                 | 49.2        | -0.7           |
| 250       | 6.60                 | 22.4        | -9.1           | 4.54                 | 77.6        | 15.2           |
| 300       | 5.96                 | 9           | -12.9          | 3.42                 | 91          | 32.4           |
| 350       | 6.36                 | 20.3        | -10.1          | 4.03                 | 79.7        | 21.8           |
| 400       | 2.78                 | 61.6        | 4.1            | 4.42                 | 38.4        | -4.1           |
| 450       | 3.92                 | 43.5        | -2.8           | 4.59                 | 56.5        | 2.8            |
| 500       | 5.41                 | 78.3        | 16.6           | 3.59                 | 21.7        | -10.1          |
| 550       | 4.31                 | 44          | -4.0           | 3.74                 | 56          | 6              |
| 600       | 6.63                 | 65.4        | 8.6            | 3.40                 | 34.6        | -6.5           |
| 650       | 6.67                 | 23.5        | -9.6           | 3.65                 | 76.5        | 22.1           |
| 700       | 6.75                 | 25.7        | -7.2           | 4.49                 | 74.3        | 9.9            |
| 750       | 5.67                 | 32.4        | -6.7           | 6.57                 | 67.6        | 9.4            |
| 800       | 6.74                 | 11          | -12.5          | 4.04                 | 88.9        | 26.5           |
| 850       | 6.52                 | 42.4        | -3.5           | 4.50                 | 57.6        | 3.5            |
| 900       | 6.41                 | 24.4        | -8.6           | 3.24                 | 75.6        | 14             |
| 950       | 8.10                 | 24.3        | -7.6           | 4.05                 | 75.7        | 10.6           |
| 1000      | 6.88                 | 56.9        | 9.9            | 4.89                 | 43.1        | -5.6           |

**C) CB1-AM11542 simulations replicate 2**

| Time (ns) | Antagonist Dataset   |             |                | Agonist Dataset      |             |                |
|-----------|----------------------|-------------|----------------|----------------------|-------------|----------------|
|           | Best Ligand RMSD (Å) | ROC AUC (%) | Adj LogAUC (%) | Best Ligand RMSD (Å) | ROC AUC (%) | Adj LogAUC (%) |
| 0         | 5.43                 | 13.20       | -11.9          | 2.95                 | 86.8        | 25.3           |
| 50        | 4.01                 | 8.60        | -12            | 4.15                 | 91.4        | 27.5           |
| 100       | 5.13                 | 57.00       | 2.2            | 3.37                 | 43          | -2.6           |
| 150       | 6.88                 | 32.40       | -7.3           | 2.96                 | 67.6        | 11.4           |
| 200       | 4.44                 | 54.7        | 6.0            | 4.92                 | 45.3        | -4.3           |
| 250       | 8.85                 | 11.7        | -11.6          | 7.20                 | 88.3        | 26.2           |
| 300       | 6.73                 | 47.8        | -2.5           | 3.10                 | 52.2        | 2.4            |
| 350       | 6.21                 | 34.9        | -5.7           | 4.62                 | 65.1        | 6.6            |
| 400       | 6.63                 | 31.6        | -6.9           | 7.24                 | 68.4        | 9.2            |
| 450       | 7.22                 | 15.3        | -11.6          | 3.75                 | 84.7        | 24.3           |
| 500       | 5.61                 | 40.2        | -4.5           | 6.95                 | 59.8        | 5.9            |
| 550       | 6.08                 | 25.5        | -9.7           | 4.63                 | 74.5        | 17.9           |
| 600       | 6.13                 | 31.9        | -7.1           | 6.97                 | 68.1        | 10.5           |
| 650       | 6.61                 | 77.3        | 10.3           | 5.17                 | 22.7        | -7.8           |
| 700       | 6.02                 | 56.8        | 2.0            | 5.11                 | 43.2        | -2.1           |
| 750       | 6.46                 | 13.7        | -11.6          | 6.93                 | 86.3        | 21.1           |
| 800       | 7.04                 | 45.0        | -1.8           | 3.11                 | 55.0        | 1.5            |
| 850       | 6.26                 | 31.7        | -5.9           | 4.53                 | 68.3        | 7.6            |
| 900       | 6.16                 | 30.9        | -6.3           | 3.46                 | 69.1        | 8.2            |
| 950       | 9.39                 | 47.0        | -0.8           | 4.66                 | 53.0        | 0.4            |
| 1000      | 9.55                 | 45.3        | -1.8           | 6.38                 | 54.7        | 1.5            |

**D) CB1-AM11542 simulations replicate 3**

| Time (ns) | Antagonist Dataset   |             |                | Agonist Dataset      |             |                |
|-----------|----------------------|-------------|----------------|----------------------|-------------|----------------|
|           | Best Ligand RMSD (Å) | ROC AUC (%) | Adj LogAUC (%) | Best Ligand RMSD (Å) | ROC AUC (%) | Adj LogAUC (%) |
| 0         | 5.66                 | 10.7        | -12.0          | 2.95                 | 89.3        | 22.5           |
| 50        | 6.52                 | 56.5        | 3.2            | 2.73                 | 43.5        | -3.2           |
| 100       | 5.46                 | 48.6        | -0.1           | 3.66                 | 51.4        | -0.3           |
| 150       | 6.61                 | 65.9        | 7.8            | 3.00                 | 34.1        | -6.0           |
| 200       | 4.58                 | 44.6        | -1.2           | 3.46                 | 55.4        | 0.9            |
| 250       | 5.48                 | 36.1        | -6.2           | 3.41                 | 63.9        | 8.7            |
| 300       | 5.63                 | 42.4        | -3.9           | 3.59                 | 57.6        | 4.9            |
| 350       | 6.92                 | 40.6        | -4.7           | 3.69                 | 59.4        | 6.6            |
| 400       | 4.67                 | 18.4        | -11.0          | 3.30                 | 81.6        | 22.1           |
| 450       | 6.97                 | 39.6        | -1.8           | 3.43                 | 60.4        | 1.4            |
| 500       | 8.74                 | 23.7        | -7.0           | 3.35                 | 76.3        | 10.1           |
| 550       | 5.76                 | 18.9        | -9.9           | 3.66                 | 81.1        | 17.7           |
| 600       | 7.43                 | 45.2        | 0.0            | 3.19                 | 54.8        | -0.3           |
| 650       | 7.21                 | 61.8        | 11.2           | 3.18                 | 38.2        | -6.8           |
| 700       | 6.12                 | 34.6        | -2.5           | 4.47                 | 65.4        | 2.9            |
| 750       | 6.90                 | 58.3        | 3.5            | 3.06                 | 41.7        | -3.6           |
| 800       | 6.85                 | 29.0        | -8.7           | 3.16                 | 71.0        | 15.5           |
| 850       | 6.52                 | 14.4        | -11.1          | 3.09                 | 85.5        | 27.5           |
| 900       | 5.28                 | 14.4        | -11.1          | 2.43                 | 85.6        | 23.4           |
| 950       | 6.82                 | 30.7        | -5.2           | 3.71                 | 69.3        | 5.9            |
| 1000      | 6.64                 | 52.0        | 1.9            | 3.58                 | 48.0        | -2.0           |

**E) CB1\*-taranabant simulations replicate 1**

| Time (ns) | Antagonist Dataset   |             |                | Agonist Dataset      |             |                |
|-----------|----------------------|-------------|----------------|----------------------|-------------|----------------|
|           | Best Ligand RMSD (Å) | ROC AUC (%) | Adj LogAUC (%) | Best Ligand RMSD (Å) | ROC AUC (%) | Adj LogAUC (%) |
| 0         | 6.84                 | 24.6        | -9.5           | 0.89                 | 75.4        | 17.0           |
| 50        | 6.21                 | 14.0        | -11.5          | 0.66                 | 86.0        | 25.3           |
| 100       | 6.61                 | 16.2        | -11.5          | 2.61                 | 83.8        | 22.3           |
| 150       | 5.84                 | 31.6        | -7.6           | 1.59                 | 68.4        | 10.6           |
| 200       | 6.27                 | 39.4        | -2.9           | 0.98                 | 60.6        | 2.9            |
| 250       | 6.61                 | 27.3        | -7.6           | 1.26                 | 72.7        | 10.1           |
| 300       | 6.98                 | 10.9        | -11.9          | 1.19                 | 89.1        | 29.0           |
| 350       | 6.63                 | 14.2        | -11.1          | 0.92                 | 85.8        | 23.3           |
| 400       | 6.17                 | 21.2        | -9.2           | 0.91                 | 78.8        | 14.9           |
| 450       | 6.60                 | 42.8        | -2.5           | 0.66                 | 57.2        | 2.4            |
| 500       | 5.98                 | 5.8         | -12.8          | 0.92                 | 94.2        | 37.8           |
| 550       | 6.24                 | 32.0        | -4.9           | 1.52                 | 68.0        | 6.5            |
| 600       | 6.53                 | 28.0        | -8.8           | 1.14                 | 72.1        | 13.9           |
| 650       | 6.35                 | 26.1        | -7.1           | 1.07                 | 73.9        | 9.5            |
| 700       | 5.83                 | 10.2        | -11.6          | 2.23                 | 89.8        | 23.5           |
| 750       | 6.33                 | 39.4        | -5.0           | 1.24                 | 60.6        | 6.0            |
| 800       | 5.94                 | 28.3        | -7.2           | 1.53                 | 71.7        | 10.1           |
| 850       | 6.12                 | 27.8        | -7.8           | 0.66                 | 72.2        | 10.5           |
| 900       | 6.31                 | 54.7        | 1.4            | 2.44                 | 45.3        | -1.7           |
| 950       | 6.02                 | 41.0        | -4.6           | 2.00                 | 59.0        | 5.4            |
| 1000      | 6.05                 | 18.3        | -9.6           | 0.96                 | 81.7        | 15.9           |

**F) CB1\*-taranabant simulations replicate 2**

| Time (ns) | Antagonist Dataset   |             |                | Agonist Dataset      |             |                |
|-----------|----------------------|-------------|----------------|----------------------|-------------|----------------|
|           | Best Ligand RMSD (Å) | ROC AUC (%) | Adj LogAUC (%) | Best Ligand RMSD (Å) | ROC AUC (%) | Adj LogAUC (%) |
| 0         | 6.84                 | 15.5        | -11.1          | 0.84                 | 84.5        | 20.9           |
| 50        | 7.67                 | 13.4        | -9.8           | 0.58                 | 86.6        | 19.6           |
| 100       | 6.77                 | 24.6        | -7.8           | 0.86                 | 75.4        | 11.6           |
| 150       | 6.62                 | 41.1        | -3.7           | 1.03                 | 58.9        | 3.7            |
| 200       | 6.38                 | 19.6        | -10.8          | 0.63                 | 80.4        | 21.8           |
| 250       | 6.73                 | 34.9        | -5.5           | 0.54                 | 65.1        | 7.0            |
| 300       | 6.77                 | 58.0        | 2.8            | 0.95                 | 42.0        | -2.8           |
| 350       | 5.72                 | 33.8        | -3.6           | 0.83                 | 66.2        | 4.3            |
| 400       | 6.09                 | 35.1        | -5.2           | 0.63                 | 64.9        | 6.1            |
| 450       | 6.03                 | 39.6        | -3.2           | 0.87                 | 60.4        | 3.3            |
| 500       | 6.66                 | 67.0        | 10.5           | 2.50                 | 33.0        | -6.7           |
| 550       | 6.23                 | 30.2        | -6.7           | 0.78                 | 69.8        | 8.9            |
| 600       | 6.98                 | 41.6        | -4.2           | 1.07                 | 58.4        | 4.7            |
| 650       | 6.91                 | 47.1        | -0.4           | 1.88                 | 52.9        | 0.0            |
| 700       | 6.98                 | 57.2        | 3.8            | 0.81                 | 42.8        | -3.8           |
| 750       | 6.43                 | 25.1        | -8.5           | 0.70                 | 74.9        | 12.7           |
| 800       | 6.90                 | 57.6        | -0.1           | 1.20                 | 42.4        | 1.1            |
| 850       | 6.99                 | 34.6        | -7.0           | 1.10                 | 65.4        | 10.8           |
| 900       | 6.37                 | 36.3        | -5.3           | 2.86                 | 63.7        | 7.3            |
| 950       | 6.76                 | 36.3        | -4.0           | 3.59                 | 63.6        | 4.2            |
| 1000      | 6.88                 | 42.1        | -4.2           | 0.93                 | 57.9        | 4.9            |

**G) CB1\*-taranabant simulations replicate 3**

| Time (ns) | Antagonist Dataset   |             |                | Agonist Dataset      |             |                |
|-----------|----------------------|-------------|----------------|----------------------|-------------|----------------|
|           | Best Ligand RMSD (Å) | ROC AUC (%) | Adj LogAUC (%) | Best Ligand RMSD (Å) | ROC AUC (%) | Adj LogAUC (%) |
| 0         | 6.84                 | 16.9        | -11.1          | 0.89                 | 83.1        | 21.4           |
| 50        | 6.70                 | 11.0        | -12.6          | 0.66                 | 89.0        | 27.8           |
| 100       | 6.19                 | 60.0        | 3.7            | 0.99                 | 40.0        | -3.4           |
| 150       | 6.81                 | 21.8        | -9.6           | 2.68                 | 78.2        | 14.9           |
| 200       | 6.08                 | 52.8        | 2.0            | 4.38                 | 47.2        | -2             |
| 250       | 6.62                 | 38.3        | -5.4           | 0.45                 | 61.7        | 7.5            |
| 300       | 6.95                 | 40.7        | -2.5           | 0.46                 | 59.3        | 22.8           |
| 350       | 6.37                 | 53.3        | 0.1            | 7.36                 | 46.7        | -0.1           |
| 400       | 6.25                 | 38.9        | -0.5           | 1.44                 | 61.1        | 1.5            |
| 450       | 5.99                 | 61.7        | 6.0            | 1.50                 | 38.3        | -4.6           |
| 500       | 6.38                 | 34.6        | -5.5           | 1.34                 | 65.4        | 5.9            |
| 550       | 6.99                 | 55.0        | 2.7            | 0.61                 | 45.0        | -2.6           |
| 600       | 6.66                 | 28.8        | -6.8           | 0.86                 | 71.2        | 8.9            |
| 650       | 6.12                 | 29.9        | -7.4           | 0.86                 | 70.1        | 9.9            |
| 700       | 5.94                 | 51.6        | 3.0            | 1.04                 | 48.4        | -2.4           |
| 750       | 6.43                 | 36.3        | -4.3           | 2.86                 | 63.7        | 4.7            |
| 800       | 6.90                 | 67.0        | 8.4            | 1.37                 | 33.0        | -6.1           |
| 850       | 6.48                 | 27.4        | -7.2           | 1.57                 | 72.6        | 10.7           |
| 900       | 6.52                 | 56.3        | 8.5            | 1.29                 | 43.7        | -4.8           |
| 950       | 6.47                 | 34.9        | -5.1           | 1.89                 | 65.1        | 5.8            |
| 1000      | 6.00                 | 45.6        | -1.5           | 3.44                 | 54.4        | 0.8            |



## H) CB1-AM11542 simulations mean values

| Time (ns)        | Antagonist Dataset             |                       |                          | Agonist Dataset                |                       |                          |
|------------------|--------------------------------|-----------------------|--------------------------|--------------------------------|-----------------------|--------------------------|
|                  | Mean Best Ligand RMSD (Å ± SD) | Mean ROC AUC (% ± SD) | Mean Adj LogAUC (% ± SD) | Mean Best Ligand RMSD (Å ± SD) | Mean ROC AUC (% ± SD) | Mean Adj LogAUC (% ± SD) |
| 0                | 5.61 ± 0.13                    | 10.9 ± 1.8            | -12.2 ± 0.3              | 2.98 ± 0.03                    | 89.1 ± 1.8            | 25.3 ± 2.2               |
| 50               | 6.09 ± 1.56                    | 31.8 ± 19.6           | -0.9 ± 7.9               | 3.51 ± 0.59                    | 68.2 ± 19.6           | 10.6 ± 12.7              |
| 100              | 4.61 ± 0.98                    | 51.0 ± 4.3            | -0.1 ± 1.8               | 3.43 ± 0.16                    | 49.0 ± 4.3            | -0.1 ± 2.1               |
| 150              | 6.22 ± 0.75                    | 50.5 ± 13.8           | 0.2 ± 6.2                | 3.35 ± 0.53                    | 49.5 ± 13.8           | 1.8 ± 7.2                |
| 200              | 4.94 ± 0.60                    | 50.0 ± 4.2            | 1.7 ± 3.1                | 4.02 ± 0.65                    | 50.0 ± 4.2            | -1.4 ± 2.2               |
| 250              | 6.98 ± 1.40                    | 23.4 ± 10.2           | -9.0 ± 2.2               | 5.05 ± 1.59                    | 76.6 ± 10.0           | 16.7 ± 7.2               |
| 300              | 6.11 ± 0.46                    | 33.1 ± 17.2           | -6.4 ± 4.6               | 3.37 ± 0.20                    | 66.9 ± 17.2           | 13.2 ± 13.6              |
| 350              | 6.50 ± 0.31                    | 31.9 ± 8.5            | -6.8 ± 2.3               | 4.11 ± 0.39                    | 68.1 ± 8.5            | 11.7 ± 7.2               |
| 400              | 4.69 ± 1.57                    | 37.2 ± 18.1           | -4.6 ± 6.4               | 4.99 ± 1.66                    | 62.8 ± 18.1           | 9.1 ± 10.7               |
| 450              | 6.03 ± 1.50                    | 32.8 ± 12.5           | -5.4 ± 4.4               | 3.92 ± 0.49                    | 67.2 ± 12.5           | 9.5 ± 10.5               |
| 500              | 6.58 ± 1.52                    | 47.4 ± 22.9           | 1.7 ± 10.6               | 4.63 ± 1.64                    | 52.6 ± 22.9           | 2.0 ± 8.7                |
| 550              | 5.38 ± 0.77                    | 29.5 ± 10.6           | -7.9 ± 2.7               | 4.01 ± 0.44                    | 70.5 ± 10.6           | 13.9 ± 5.6               |
| 600              | 6.73 ± 0.53                    | 47.5 ± 13.8           | 0.5 ± 6.4                | 4.52 ± 1.73                    | 52.5 ± 13.8           | 1.2 ± 7.0                |
| 650              | 6.83 ± 0.27                    | 54.2 ± 22.9           | 4.0 ± 9.6                | 4.00 ± 0.85                    | 45.8 ± 22.6           | 2.5 ± 13.9               |
| 700              | 6.30 ± 0.32                    | 39.0 ± 13.1           | -2.6 ± 3.8               | 4.69 ± 0.30                    | 61.0 ± 13.1           | 3.6 ± 4.9                |
| 750              | 6.35 ± 0.51                    | 34.8 ± 18.3           | -4.9 ± 6.3               | 5.52 ± 1.75                    | 65.2 ± 18.3           | 9.0 ± 10.1               |
| 800              | 6.88 ± 0.12                    | 28.3 ± 13.9           | -7.7 ± 4.4               | 3.44 ± 0.43                    | 71.6 ± 13.8           | 14.5 ± 10.2              |
| 850              | 6.43 ± 0.12                    | 29.5 ± 11.5           | -6.8 ± 3.2               | 4.04 ± 0.67                    | 70.5 ± 11.5           | 12.9 ± 10.5              |
| 900              | 5.95 ± 0.48                    | 23.2 ± 6.8            | -8.7 ± 2.0               | 3.05 ± 0.44                    | 76.8 ± 6.8            | 15.2 ± 6.3               |
| 950              | 8.10 ± 1.05                    | 34.0 ± 9.6            | -4.5 ± 2.8               | 4.14 ± 0.39                    | 66.0 ± 9.6            | 5.6 ± 4.2                |
| 1000             | 7.69 ± 1.32                    | 51.4 ± 4.8            | 3.3 ± 4.9                | 4.95 ± 1.14                    | 48.6 ± 4.8            | -2.0 ± 2.9               |
| Whole simulation | 6.23 ± 1.26                    | 36.7 ± 17.6           | -3.7 ± 6.9               | 4.08 ± 1.17                    | 63.3 ± 17.6           | 8.3 ± 10.9               |

**I) CB1\*-taranabant simulations mean values**

| Time (ns)        | Antagonist Dataset             |                       |                          | Agonist Dataset                |                       |                          |
|------------------|--------------------------------|-----------------------|--------------------------|--------------------------------|-----------------------|--------------------------|
|                  | Mean Best Ligand RMSD (Å ± SD) | Mean ROC AUC (% ± SD) | Mean Adj LogAUC (% ± SD) | Mean Best Ligand RMSD (Å ± SD) | Mean ROC AUC (% ± SD) | Mean Adj LogAUC (% ± SD) |
| 0                | 6.84 ± 0.00                    | 19.0 ± 4.0            | -10.6 ± 0.8              | 0.87 ± 0.02                    | 81.0 ± 4.0            | 19.8 ± 2.0               |
| 50               | 6.86 ± 0.61                    | 12.8 ± 1.3            | -11.3 ± 1.2              | 0.64 ± 0.04                    | 87.2 ± 1.3            | 24.2 ± 3.4               |
| 100              | 6.52 ± 0.24                    | 33.6 ± 19.0           | -5.2 ± 6.5               | 1.49 ± 0.80                    | 66.4 ± 19.0           | 10.2 ± 10.5              |
| 150              | 6.42 ± 0.42                    | 31.5 ± 7.9            | -7.0 ± 2.4               | 1.76 ± 0.68                    | 68.5 ± 7.9            | 9.7 ± 4.6                |
| 200              | 6.24 ± 0.12                    | 37.3 ± 13.6           | -3.9 ± 5.3               | 2.00 ± 1.69                    | 62.7 ± 13.6           | 7.6 ± 10.3               |
| 250              | 6.65 ± 0.05                    | 33.5 ± 4.6            | -6.2 ± 1.0               | 0.75 ± 0.36                    | 66.5 ± 4.6            | 8.2 ± 1.4                |
| 300              | 6.90 ± 0.10                    | 36.5 ± 19.5           | -3.9 ± 6.1               | 0.87 ± 0.31                    | 63.5 ± 19.5           | 16.3 ± 13.8              |
| 350              | 6.24 ± 0.38                    | 33.8 ± 16.0           | -4.9 ± 4.7               | 3.04 ± 3.06                    | 66.2 ± 16.0           | 9.2 ± 10.2               |
| 400              | 6.17 ± 0.07                    | 31.7 ± 7.6            | -5.0 ± 3.6               | 1.00 ± 0.34                    | 68.3 ± 7.6            | 7.5 ± 5.6                |
| 450              | 6.21 ± 0.28                    | 48.0 ± 9.8            | 0.1 ± 4.2                | 1.01 ± 0.36                    | 52.0 ± 9.8            | 0.4 ± 3.5                |
| 500              | 6.34 ± 0.28                    | 35.8 ± 25.0           | -2.6 ± 9.7               | 1.58 ± 0.67                    | 64.2 ± 25.0           | 12.3 ± 18.7              |
| 550              | 6.49 ± 0.36                    | 39.1 ± 11.3           | -3.0 ± 4.1               | 0.97 ± 0.40                    | 60.9 ± 11.3           | 4.3 ± 5.0                |
| 600              | 6.72 ± 0.19                    | 32.8 ± 6.2            | -6.6 ± 1.9               | 1.02 ± 0.12                    | 67.2 ± 6.2            | 9.2 ± 3.8                |
| 650              | 6.46 ± 0.33                    | 34.4 ± 9.1            | -5.0 ± 3.2               | 1.27 ± 0.44                    | 65.6 ± 9.1            | 6.5 ± 4.6                |
| 700              | 6.25 ± 0.52                    | 39.7 ± 21.0           | -1.6 ± 7.1               | 1.36 ± 0.62                    | 60.3 ± 21.0           | 5.8 ± 12.6               |
| 750              | 6.40 ± 0.05                    | 33.6 ± 6.1            | -5.9 ± 1.8               | 1.60 ± 0.92                    | 66.4 ± 6.1            | 7.8 ± 3.5                |
| 800              | 6.58 ± 0.45                    | 51.0 ± 16.5           | 0.4 ± 6.4                | 1.36 ± 0.13                    | 49.0 ± 16.5           | 1.7 ± 6.6                |
| 850              | 6.53 ± 0.35                    | 29.9 ± 3.3            | -7.3 ± 0.3               | 1.11 ± 0.37                    | 70.1 ± 3.3            | 10.7 ± 0.1               |
| 900              | 6.40 ± 0.09                    | 49.1 ± 9.1            | 1.5 ± 5.6                | 2.19 ± 0.66                    | 50.9 ± 9.1            | 0.3 ± 5.1                |
| 950              | 6.42 ± 0.31                    | 37.4 ± 2.6            | -4.6 ± 0.4               | 2.49 ± 0.78                    | 62.6 ± 2.6            | 5.1 ± 0.7                |
| 1000             | 6.31 ± 0.40                    | 35.3 ± 12.1           | -5.1 ± 3.4               | 1.78 ± 1.17                    | 64.7 ± 12.1           | 7.2 ± 6.4                |
| Whole simulation | 6.47 ± 0.38                    | 35.0 ± 15.1           | -4.6 ± 5.5               | 1.44 ± 1.11                    | 65.0 ± 15.1           | 8.8 ± 9.7                |

### A) RMSD of CB1\*-taranabant TM helices versus active state CB1 crystal structure (5XRA)

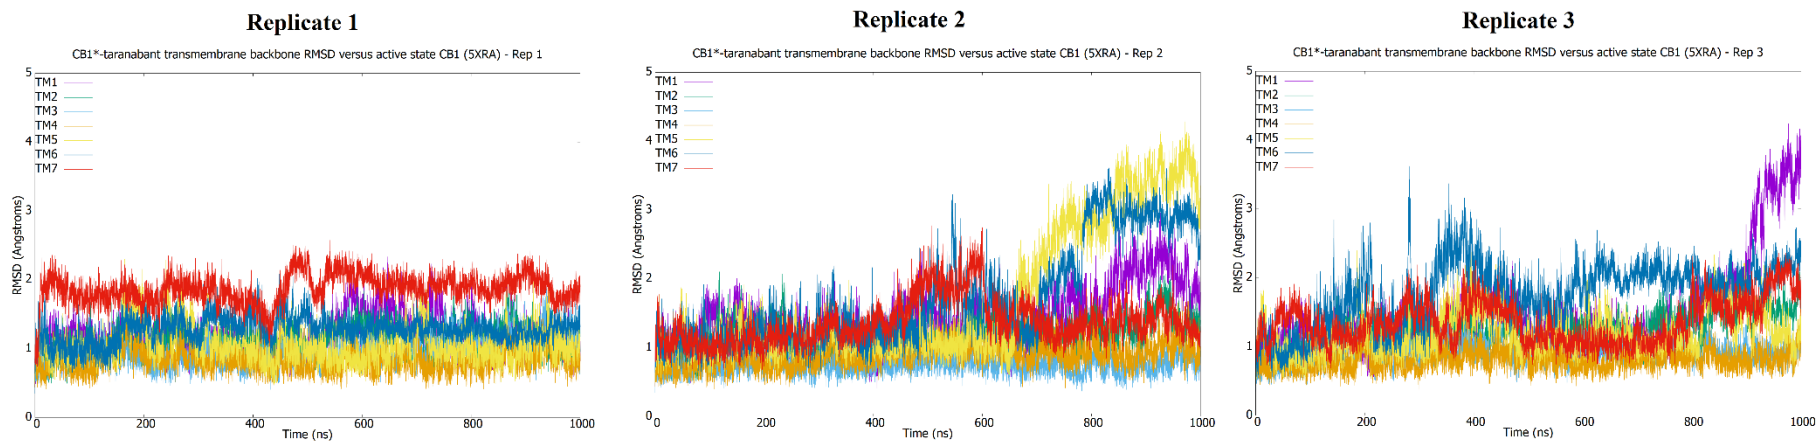

### B) RMSD of CB1\*-taranabant TM helices versus inactive state CB1 crystal structure (5U09)

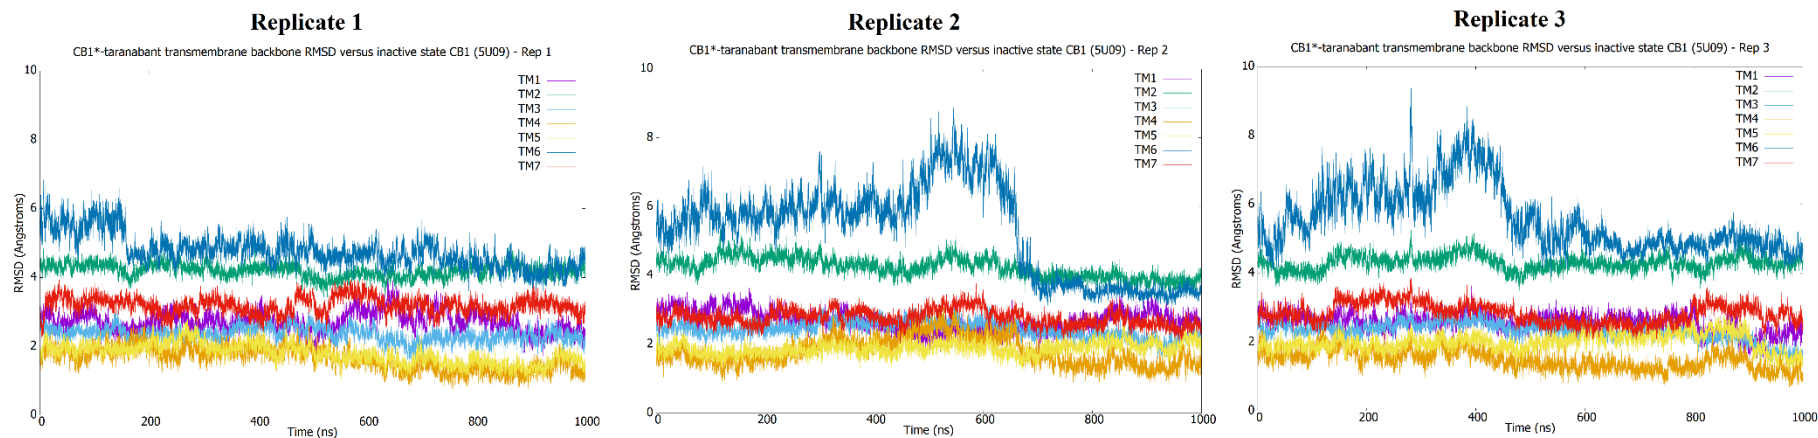

**Figure S1.** Individual TM helix RMSDs of CB1\*-taranabant versus the original active-state crystal structure (5XRA) and the inactive-state crystal structure (5U09).

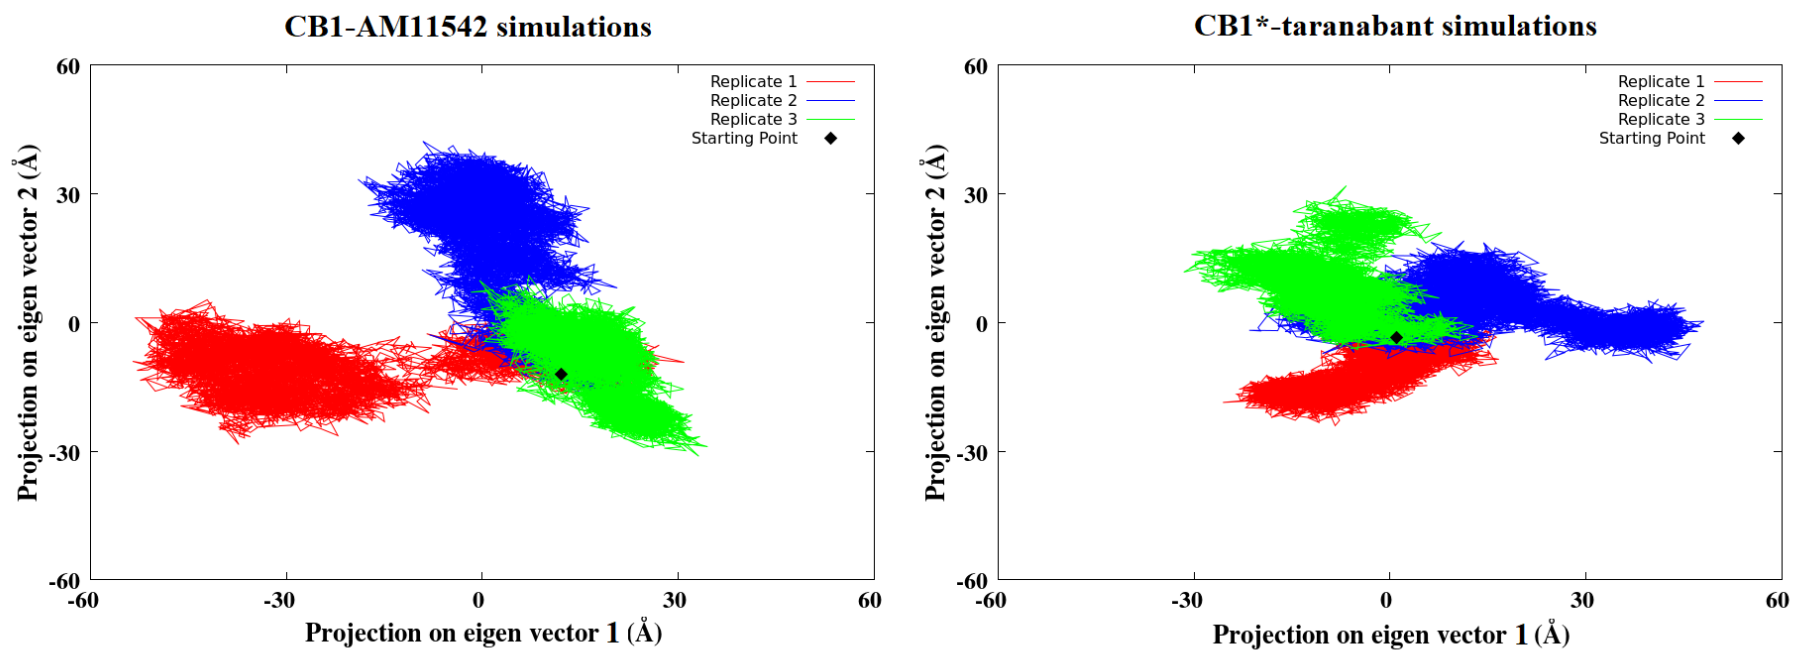

**Figure S2.** Principal components analysis of CB1-AM11542 and CB1\*-taranabant simulations based on movement of receptor transmembrane backbone atoms. Plots are based on the the two principal components with the highest eigenvector values, which therefore represent most of the observed intermolecular movements. All three replicates in both simulations are observed to sample different regions of phase space.

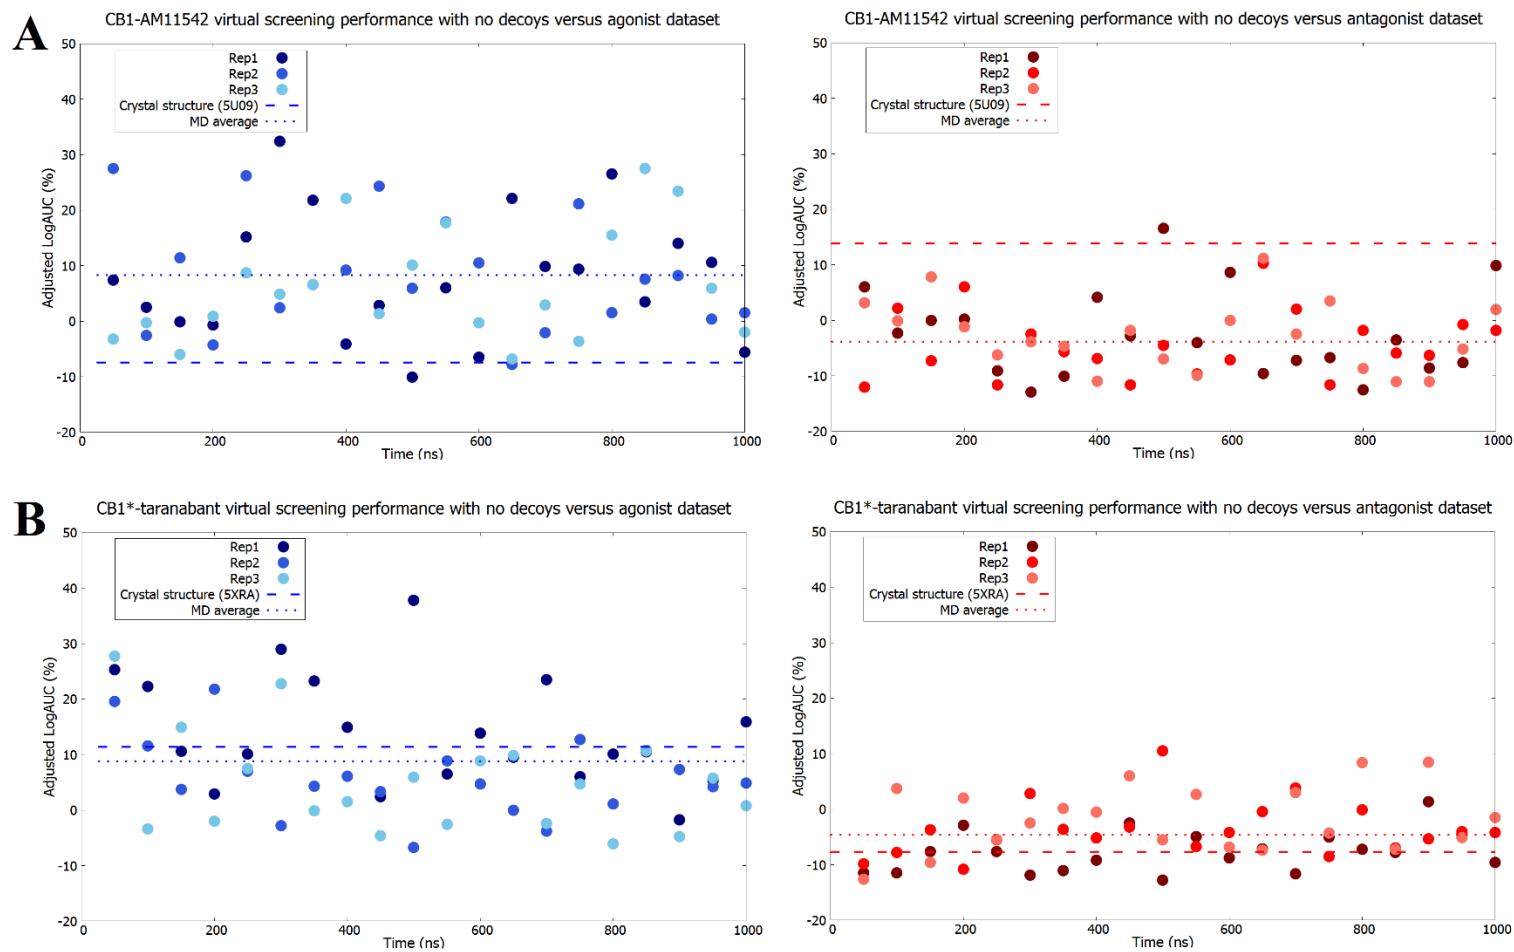

**Figure S3.** Comparison of direct agonist/antagonist discrimination (no decoy molecules) throughout molecular dynamics simulations of (A) CB1-AM11542 structures and (B) CB1\*-taranabant structures. Adjusted logAUC values with agonists designated as actives are shown as blue dots, while values using antagonist as actives are shown as red dots. The performance of the original crystal structures and the average across all replicates are shown as dashed lines.
